# Supplementary material for: MiR-30b Is Involved in the Homocysteine-Induced Apoptosis in Human Coronary Artery Endothelial Cells by Regulating the Expression of Caspase 3
Source: PubMed Central journal article supplement (PMC4581215; doi:10.3390/ijms160817682), 2015-07-31
Supplement: ijms-16-17682-s001.pdf [file ijms-16-17682-s001.pdf]

## Supplementary Information

**Table S1.** The Gray value of the sample in Figure 7.

| <b>Groups</b>          | <b><math>\beta</math> Actin</b> | <b>Cleaved Caspase 3</b> |
|------------------------|---------------------------------|--------------------------|
| Control                | 365,424                         | 63,000                   |
| Hcy + miR-30b negative | 352,720                         | 242,172                  |
| Hcy + miR-30b mimic    | 357,000                         | 136,416                  |

**Table S2.** The gray value ratio of the  $\beta$  actin and cleaver caspase 3.

| <b>Groups</b>          | <b>Ratio (Clever Caspase 3/<math>\beta</math> Actin)</b> |
|------------------------|----------------------------------------------------------|
| Control                | 0.17                                                     |
| Hcy + miR-30b negative | 0.69                                                     |
| Hcy + miR-30b mimic    | 0.38                                                     |
